# Supplementary material for: Isotopic constraints on wildfire derived HONO
Source: Copernicus journal article supplement (doi:10.5194/acp-2021-225), 2021-03-29
Supplement: Supplementary file [file acp-2021-225-RC1-supplement.pdf]

Review of ACP 2021-225, Isotopic Constraints on Wildfire derived HONO, by Chai, et al.,

This paper presents  $^{15}\text{N}$  and  $^{18}\text{O}$  isotopic analyses of HONO and NO<sub>x</sub> in ground-based samples impacted by wildfire smoke. Unfortunately, it is clear from extensive previous work (Grosjean et al., 1984, Grosjean and Harrison, 1985, and references in Roberts 1990) that the method for sampling NO<sub>x</sub> has a 1:1 interference from PAN compounds. This renders the NO<sub>x</sub> measurements reported here invalid since we know that PAN and associated compounds are significant N products in even relatively ‘young’ wildfire plumes. There might still be information in these measurements that could be a useful addition to our understanding of HONO chemistry in these plumes, but the over-all analysis will need to be completely re-thought. In addition to the above, I found the presentation very difficult to follow, and some sections having to do with HONO alone will need to be extensively revised for the paper to be acceptable. This paper is simply not valid in its current form due to the problem with NO<sub>x</sub> measurement, and must be rejected for publication at this time. I have the following General Comments that would also need to be addressed, in any future publication, but have refrained from making specific comments.

#### General Comments

The collection and hydrolysis of PAN in alkaline solution was an early method for the calibration of PAN standards (see for example Stephens, 1969, Grosjean et al., 1984, Grosjean and Harrison, 1985, and references in Roberts 1990) but has somewhat fallen out of favor with the advent of efficient photochemical sources for PANs. The method used for NO<sub>x</sub> collection in this paper uses the same conditions (e.g. [OH<sup>-</sup>] concentrations) as those PAN collection techniques. Moreover, the alkaline hydrolysis of PANs produces nitrite ion, which will be oxidized by the KMnO<sub>4</sub> in the impinger solution in the same manner as the nitrite that arises from NO<sub>x</sub> collection. Therefore, we can conclude with considerable confidence that PANs will interfere completely with the NO<sub>x</sub> method used in this work.

One of the biggest issues with the analysis is that the airmass classifications (e.g. YN, YD, AN, AD, and MD) are presented here on the basis of the isotope analysis alone. This imparts a bit of circular logic to the assignment of these classes. A more complete basis for these classifications apparently was presented in the Kaspari et al 2021 reference, so this should be summarized here for support. Also, if they were initially made using the isotopic analysis, then say so and then support those assertions with other data.

The authors use the notation  $f_{O_3/(O_3+RO_2)}^{NO}$ , in Equations 4 and 5, but then use  $f_{O_3/RO_2}^{NO}$  in the text – are these meant to be the same thing? If so, this is really confusing. It didn’t seem like  $f_{O_3/RO_2}^{NO}$  was defined anywhere else, so I had to assume it was the same as the factor define in Equation 5.

In Figure 1 and associated analysis and discussion around Reactions 6 and 7, the isotope fractionations are the same for both  $^{15}\text{N}$  and  $^{18}\text{O}$ . How then can this support the statements on Lines 361-362 that R6 and R7 lead to very different  $\delta^{18}\text{O}$  values? – this doesn’t make sense on the face of it, and is not at all adequately explained by the material in Appendix B. Is this because of the large difference in  $\delta^{18}\text{O}$  for O<sub>3</sub> relative to H<sub>2</sub>O? but both reactions 6 and 7 involve NO<sub>2</sub> and (which gets an  $^{18}\text{O}$  effect from O<sub>3</sub>). This whole phenomenon is just not well explained

at all in Appendix B. Also, the nomenclature in Appendix B is faulty, the reactions B10-12, apparently have mixed subscripts that sometimes denote a chemical (e.g.  $O_3$  =ozone I assume) and sometimes a reaction (e.g.  $O_{6,t}$ ) and what is 't' in these subscripts?

Nighttime processing of  $NO_x$  through  $NO_3$  and  $N_2O_5$  can be quite important chemical pathways to  $HNO_3$ . Wouldn't these impart an even large  $\delta^{18}O$  to the  $NO_3^-$  and therefore any HONO derived form that nitrate, since those reactions involve 2 molecules of  $O_3$ ? How would that impact the analysis.

## References

Grosjean, D., Fung, K., Collins, J., Harrison, J., and Breitung, E., Portable generator for on-site calibration of peroxyacetyl nitrate analyzers, *Anal. Chem.*, 56, 569-573, 1984.

Grosjean, D., and Harrison, J., Peroxyacetyl nitrate: Comparison of alkaline hydrolysis and chemiluminescence methods., *Environ. Sci. Technol.*, 19, 749-752, 1985.

Roberts, J.M., The atmospheric chemistry of organic nitrates, *Atmos. Environ*, 24A, 243-287, 1990.

Stephens, E.R. The formation, reactions, and properties of peroxyacetyl nitrates (PANs) in photochemical air pollution, *Adv. Environ. Sci.*, 1, 119-146, 1969.
